# Supplementary material for: H3K36 methylation promotes longevity by enhancing transcriptional fidelity
Source: PubMed Central journal article supplement — Genes Dev. 2015 Jul 1;29(13):1362–76. doi: 10.1101/gad.263707.115 (PMC4511212; doi:10.1101/gad.263707.115), 2015-07-01

**GENESDEV/2015/263707\_Fig. S2\_Sen**

| Strain name | Histone | Genotype           | Old (16) | Old (19.3) | Old (21) |
|-------------|---------|--------------------|----------|------------|----------|
| H3H4WT-002  | WT      | sir2 deletion      | -0.575   | -1         | -2.15    |
| H3H4WT-005  | WT      | sir2 deletion      | -0.85    | -0.6       | -1.95    |
| H3H4WT-006  | WT      | sir2 deletion      | -1.3     | -0.5       | -1.85    |
| H3H4WT-001  | WT      | sir2 deletion      | -0.85    | -0.25      | -1.7     |
| H3H4WT-003  | WT      | sir2 deletion      | -0.65    | -0.6       | -1.675   |
| H3H4WT-004  | WT      | sir2 deletion      | 0.425    | 0.5        | -1.325   |
| H3H4WT-011  | WT      | SIR2 WT            | -0.2     | -0.6       | -0.325   |
| H3H4WT-018  | WT      | SIR2 WT            | -0.15    | 0          | -0.15    |
| H3H4WT-010  | WT      | SIR2 WT            | -0.175   | -0.1       | -0.075   |
| H3H4WT-009  | WT      | SIR2 WT            | -0.075   | 0.2        | 0.033333 |
| H3H4WT-017  | WT      | SIR2 WT            | -0.075   | 0.2        | 0.075    |
| H3H4WT-016  | WT      | SIR2 WT            | -0.225   | -0.15      | 0.1      |
| H3H4WT-008  | WT      | SIR2 overexpressed | -0.1     | -0.3       | 0.275    |
| H3H4WT-007  | WT      | SIR2 overexpressed | -0.05    | 0.2        | 0.3      |
| H3H4WT-015  | WT      | SIR2 overexpressed | -0.075   | 0.5        | 0.475    |
| H3H4WT-013  | WT      | SIR2 overexpressed | -0.1     | 0.4        | 0.5      |

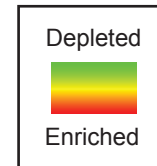

Supplement: supp_29.13.1362_Figure_S2.pdf [file supp_29.13.1362_Figure_S2.pdf]
