# Supplementary material for: H3K36 methylation promotes longevity by enhancing transcriptional fidelity
Source: PubMed Central journal article supplement — Genes Dev. 2015 Jul 1;29(13):1362–76. doi: 10.1101/gad.263707.115 (PMC4511212; doi:10.1101/gad.263707.115), 2015-07-01
Supplement: supp_29.13.1362_Figure_S11.pdf [file supp_29.13.1362_Figure_S11.pdf]

**A**

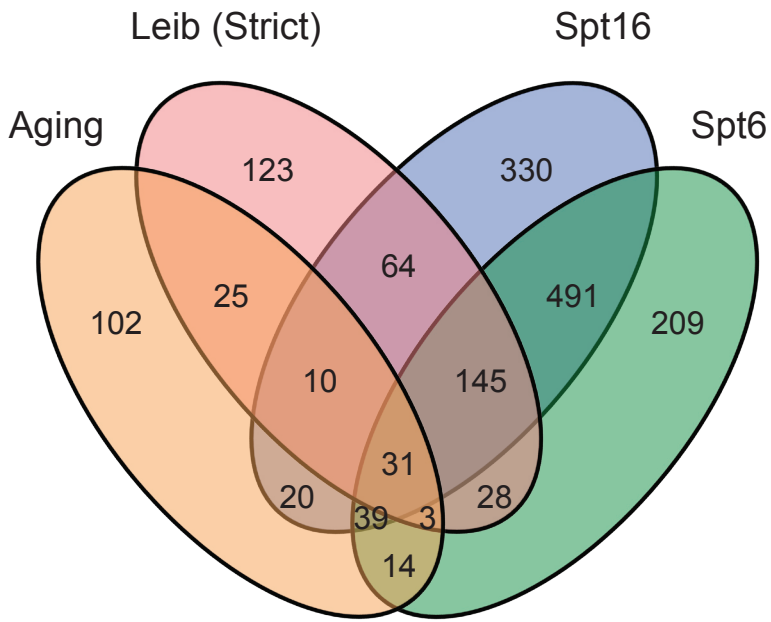

**B**

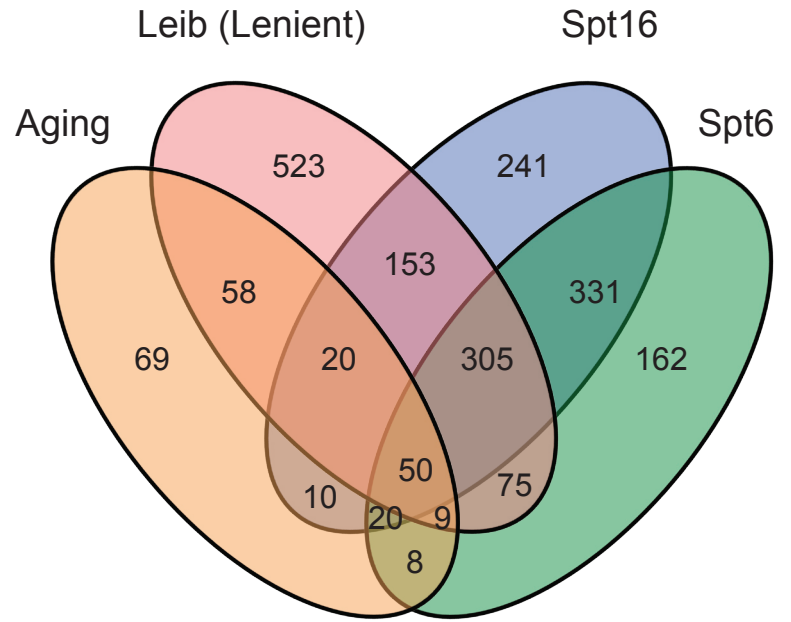

**C**

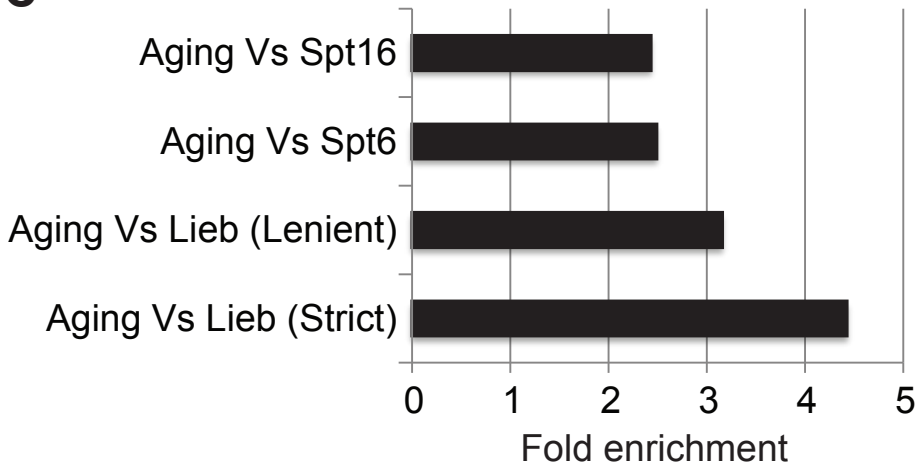

p values of overlap

|                          |                        |
|--------------------------|------------------------|
| Aging vs Lieb (lenient): | $3.04 \times 10^{-43}$ |
| Aging vs Lieb (strict):  | $7.04 \times 10^{-28}$ |
| Aging vs Spt6:           | $1.37 \times 10^{-17}$ |
| Aging vs Spt16:          | $6.49 \times 10^{-20}$ |
