# Supplementary material for: H3K36 methylation promotes longevity by enhancing transcriptional fidelity
Source: PubMed Central journal article supplement — Genes Dev. 2015 Jul 1;29(13):1362–76. doi: 10.1101/gad.263707.115 (PMC4511212; doi:10.1101/gad.263707.115), 2015-07-01
Supplement: supp_29.13.1362_SuppMaterial.pdf [file supp_29.13.1362_SuppMaterial.pdf]

## **Supplementary Information**

### **Supplementary Methods**

#### RNA-seq and ChIP-seq datasets

RNA-seq and ChIP-seq datasets used in this manuscript are listed in Table S4.

#### Computational analysis

Alignment: RNA-seq data were aligned using tophat v2.0.5 and bowtie indices for the sacCer2 and ce10 genomes. RNA-seq tags were trimmed to 35bp before alignment, and tags mapping to rDNA loci were removed after alignment. Libraries were stranded and tophat was run using the parameter --library-type fr-firststrand to reflect this. Additionally, only the optimal alignment for each tag was recorded (-g 1), and importantly, data were not aligned using a reference transcriptome as a guide. ChIP-seq data were aligned using bowtie v0.12.7 and v0.12.5 in the case of the first and second replicate of H3K36me3 data respectively. ChIP-seq data were aligned with parameters -m 1 --best, to guarantee a single optimal alignment for each tag and to remove tags mapping optimally to multiple loci.

Track Creation and Data Averaging: Track visualizations were created for the UCSC Genome Browser in the following way. First, replicate data were individually converted from bowtie output to BED files using in-house scripts. BEDs were made into coverage maps using the BEDtools program genomeCoverageBed with the -bg option. The resulting bedGraphs were then adjusted to the number of billions of bases sequenced for each sample. The adjusted bedGraphs were then combined by unweighted average. ChIP-seq data were then normalized to H3 (subtraction) to correct for local sonication efficiency bias and estimate modification changes.

RNA-seq data were split according to tags on the plus or minus reference strand after conversion to BEDs. Resulting bedGraphs were converted into bigWigs using the UCSC tool bedGraphToBigWig.

Discovery of Cryptic Transcripts: RNA-seq tags in WT and *rph1Δ* time series were treated in the following way. All annotated SGD genes in the sacCer2 assembly were broken into 40 equal-sized units of one base-pair or more. For any given genetic background, time point, and replicate, an in-house script was employed to measure sense-strand tag density over each unit of each gene, resulting in a length-40 vector of RNA-seq enrichment for each known transcript. The first third of the transcript (subvector of size 13) was taken to be the 5' end, and the last third was the 3' end. Cryptic genes were defined as those satisfying three criteria: (a) that the 3':5' ratio in old cells exceed the 5th percentile value of all total-transcript enrichments in the old cells; (b) that the total old enrichment exceed that same cutoff; and (c) that the increase in cryptic enrichment (the ratio of ratios, 3':5' old : 3':5' young) exceed 1.5-fold. Genes were defined as cryptic in each of five replicate experiments, then the group of genes common to all five were taken to be "common cryptic genes" referred to as cryptic in the text.

Meta-Gene Plots: Meta-gene plots are made in the following way. For RNA-seq figures, sense-strand aligned tags are selected for each transcript. For each of the five short fragment replicate experiments, 40-unit vectors representing transcription from 5' to 3' were assessed and length-normalized, and a genome-wide average profile was constructed from these. Average curves were adjusted by subtracting the average 5' gene half expression score from the entire profile.

Curves were then averaged over five replicates and the standard error was calculated at each unit of the vector and represented as shaded error bands.

Heatmaps: The tag count profile for each gene was averaged over all five RNA-seq experiments.

The profiles were then adjusted by subtracting the average 5' gene half expression score.

Negative profile scores were zeroed out (black) and finally the profiles were plotted in descending order (from top to bottom) by the strength of the 3' gene half expression score in the old population.

Boxplots: Boxplots are generated in R using the distribution of various qualities of cryptic genes vs an equal-sized set of randomly selected non-cryptic genes for (a) length and (b) transcription rate. Boxplots are generated for the WT-*rph1*Δ using the 3' half of the gene only (normalizing to the 5' half) and the WT- *rph1*Δ Old/Young using the same method. p-values are based on a one-sided Mann-Whitney test.

Gene Ontology: Functional characterization of cryptic genes was performed using DAVID. The Functional Annotation Clustering option was used to group similar categories. An enrichment score for each cluster was given as a mean of  $-\log_{10}p$  of member GO categories with  $p < 0.01$ .

Sequence logos: A regular expression search for TATA[AT]A[AT][AG] in yeast and TATA[AT][AT]AG in worms revealed a number of internal TATA boxes in cryptic genes (start to stop codon only), which were then used as input to the online Weblogo tool. Similarly, a search for the initiator sequence moiety A (N5) NYA(A|T)NN N6 in yeast revealed a number of putative internal initiator sequences. These were judged to be true initiator sequences if the initial

N5 had four or more adenine and the trailing N6 matched the same criterion. Resulting sequences were also uploaded to Weblogo with default parameters. A permutation test was run to assess the statistical significance of these motifs. For each motif, the number of genes containing an internal motif was tabulated. Then 1,000 permutations were performed. In each iteration, an equal number of randomly selected non-cryptic genes was sampled and the number containing an internal TATA or initiator motif was assessed. These formed a background distribution; p-values reported are the fraction of permutations where the number of background genes with the internal motif exceeds the number of cryptic genes with internal motifs (Table S6).

### **Supplementary Figure Legends**

#### Fig. S1 Replicability of aging screen

Pairwise correlation plots of four biological repeats (experiments C, D, E and F) of the aging screen with histone substitution mutant library. The relative enrichments of each mutant in the oldest population is plotted. The r values are indicated at the top.

#### Fig. S2 Performance of internal controls in the aging screen

Success of the aging screen was inferred from the enrichment/depletion profiles of *sir2* $\Delta$ , *SIR2-OE* and WT strains in the population. Six uniquely barcoded strains of each strain type (four for *SIR2-OE*) were included and their relative enrichments (RE) quantified in the aging time-course.

#### Fig. S3 Microarray versus next-generation sequencing readout in aging screen

Correlation plots of barcode enrichments in the aging screen as quantified by microarray (average of four biological replicates) and next-generation sequencing (one biological experiment). The r-value is indicated at the top.

Fig. S4 Deletion of Jhd1 has no effect on lifespan

Replicative lifespan assay with WT (blue) and *jhd1Δ* (purple). Mean lifespans are indicated in parentheses. Lifespan p-values are listed in Table S3.

Fig. S5 The rDNA locus does not play a role in lifespan extension of *rph1Δ* cells

(A) Real-time quantitative PCR was performed against the *RDN18*, *RDN58* and *NTS2* regions in the rDNA loci to detect ERC formation in WT and *rph1Δ* strains. Absolute quantities of PCR products were normalized to *ACT1* (one genomic copy in the cell). Finally, rDNA copies were calculated relative to the young of the same background. Error bars indicate standard error of the mean from two biological repeat experiments. (B) rDNA transcription from the *NTS2* locus was tested in the WT and *rph1Δ* young and old cells in two independent repeats of cell sorting.

Fig. S6 Deletion of Set2 or Rph1 does not affect telomeric silencing

Schematic showing the location (#1-5) of insertion of a *URA3* reporter at or near *TEL11L29* to assay silencing defects. WT, *set2Δ* and *rph1Δ* strains were assayed for growth on synthetic complete (SC) media, media lacking uracil (SC-ura) and media containing 5-fluoroorotic acid (SC+FOA). FOA sensitivity indicated a silencing defect.

Fig. S7 Comparison of long-fragment and short-fragment RNA-seq

(A) Comparative meta-gene plots of normalized tag counts over 244 cryptic genes in the yeast genome generated by two library preparation methods – traditional RNA-seq where the mRNA is fragmented to 200-300bp (long-fragment) and short fragment RNA-seq used in this study where the mRNA is fragmented to 40-50bp (short fragment). (B) Same data as in (A) except that the log ratio of tag counts in old over young were plotted. The plots are averaged over five short fragment replicates (E1-E5) and three long fragment replicates (E7-E9).

Fig. S8 Metagene profiles of cryptic genes in each RNA-seq dataset

Log ratios (Old/Young) of normalized RNA-seq tag counts in all RNA-seq replicates over bodies of genes that pass the defined cryptic gene filter (see Methods) in any one replicate.

Fig. S9 GO clustering analysis showing significantly enriched GO categories among cryptic genes

GO clustering analysis of the 244 cryptic genes using DAVID (<http://david.abcc.ncifcrf.gov/>). Enrichment scores are averages of  $-\log_{10} p$  for each GO terms with  $p < 10^{-3}$  in a given cluster.

Fig. S10 Deletion of subunits of the RNA degradation machineries does not produce cryptic transcripts

(A) Northern blot of mRNA isolated from yeast strains harboring no deletion (WT) or deletions in various components of RNA degradation machineries. Radiolabeled probes were designed against 5' end of *STE11*, 3' end of *STE11* and *ACT1*. RNA from *ste11* $\Delta$  strain was included as specificity control for hybridization. (B) Same as in (A) except mRNA was from yeast mutants known to form cryptic unstable transcripts.

**Fig. S11 There is significant overlap of age-related cryptic transcripts with cryptic transcripts upregulated in transcription elongation mutants**

(A-B) Four way Venn diagram showing the overlap of 244 age-related cryptic genes with cryptic genes in a *set2* $\Delta$  (Lieb strict (A) and Lieb lenient (B), *spt6* and *spt16* mutant strains. (C) Fold-enrichment of the Aging (age-related cryptic) genes in the other gene sets. p-values of the overlap (based on a hypergeometric test) are indicated.

## Supplementary Tables

Table S1 – Yeast strains

| Name                                      | Description                                              | Genotype                                                                                                                                                                                                                                                                                    |
|-------------------------------------------|----------------------------------------------------------|---------------------------------------------------------------------------------------------------------------------------------------------------------------------------------------------------------------------------------------------------------------------------------------------|
| KS2                                       | BY4741 (MAT $\alpha$ )                                   | <i>MAT<math>\alpha</math> his3<math>\Delta</math>1 leu2<math>\Delta</math>0 met15<math>\Delta</math>0 ura3<math>\Delta</math>0</i>                                                                                                                                                          |
| KS1                                       | BY4742 (MAT $\alpha$ )                                   | <i>MAT<math>\alpha</math> his3<math>\Delta</math>1 leu2<math>\Delta</math>0 lys2<math>\Delta</math>0 ura3<math>\Delta</math>0</i>                                                                                                                                                           |
| <i>rph1<math>\Delta</math></i> - a        | <i>rph1<math>\Delta</math></i> in BY4741 (MAT $\alpha$ ) | <i>MAT<math>\alpha</math> his3<math>\Delta</math>1 leu2<math>\Delta</math>0 met15<math>\Delta</math>0 ura3<math>\Delta</math>0 rph1::KanMX4</i>                                                                                                                                             |
| <i>rph1<math>\Delta</math></i> - $\alpha$ | <i>rph1<math>\Delta</math></i> in BY4742 (MAT $\alpha$ ) | <i>MAT<math>\alpha</math> his3<math>\Delta</math>1 leu2<math>\Delta</math>0 lys2<math>\Delta</math>0 ura3<math>\Delta</math>0 rph1::KanMX4</i>                                                                                                                                              |
| <i>jhd1<math>\Delta</math></i> - $\alpha$ | <i>jhd1<math>\Delta</math></i> in BY4742 (MAT $\alpha$ ) | <i>MAT<math>\alpha</math> his3<math>\Delta</math>1 leu2<math>\Delta</math>0 lys2<math>\Delta</math>0 ura3<math>\Delta</math>0 jhd1::KanMX4</i>                                                                                                                                              |
| <i>set2<math>\Delta</math></i> - a        | <i>set2<math>\Delta</math></i> in BY4741 (MAT $\alpha$ ) | <i>MAT<math>\alpha</math> his3<math>\Delta</math>1 leu2<math>\Delta</math>0 met15<math>\Delta</math>0 ura3<math>\Delta</math>0 set2::KanMX4</i>                                                                                                                                             |
| <i>set2<math>\Delta</math></i> - $\alpha$ | <i>set2<math>\Delta</math></i> in BY4742 (MAT $\alpha$ ) | <i>MAT<math>\alpha</math> his3<math>\Delta</math>1 leu2<math>\Delta</math>0 lys2<math>\Delta</math>0 ura3<math>\Delta</math>0 set2::KanMX4</i>                                                                                                                                              |
| pJD47_H3_wild-type                        | H3K36 (WT) - JB                                          | <i>MAT<math>\alpha</math> his3<math>\Delta</math>200 leu2<math>\Delta</math>0 lys2<math>\Delta</math>0 trp1<math>\Delta</math>63 ura3<math>\Delta</math>0 met15<math>\Delta</math>0 hht1-hhf1::NatMX4 can1::MFA1pr-HIS3 hht2-hhf2::URA3-HHTS-HHFS</i>                                       |
| Boeke-EMH-H3-142 K36R                     | H3K36R – JB*                                             | <i>MAT<math>\alpha</math> his3<math>\Delta</math>200 leu2<math>\Delta</math>0 lys2<math>\Delta</math>0 trp1<math>\Delta</math>63 ura3<math>\Delta</math>0 met15<math>\Delta</math>0 hht1-hhf1::NatMX4 can1::MFA1pr-HIS3 hht2-hhf2::URA3-hhfs(K36R)-HHFS</i>                                 |
| Boeke-EMH-H3-36 K36A                      | H3K36A - JB                                              | <i>MAT<math>\alpha</math> his3<math>\Delta</math>200 leu2<math>\Delta</math>0 lys2<math>\Delta</math>0 trp1<math>\Delta</math>63 ura3<math>\Delta</math>0 met15<math>\Delta</math>0 hht1-hhf1::NatMX4 can1::MFA1pr-HIS3 hht2-hhf2::URA3-hhfs(K36A)-HHFS</i>                                 |
| Boeke-EMH-H3-158 K36Q                     | H3K36Q - JB                                              | <i>MAT<math>\alpha</math> his3<math>\Delta</math>200 leu2<math>\Delta</math>0 lys2<math>\Delta</math>0 trp1<math>\Delta</math>63 ura3<math>\Delta</math>0 met15<math>\Delta</math>0 hht1-hhf1::NatMX4 can1::MFA1pr-HIS3 hht2-hhf2::URA3-hhfs(K36Q)-HHFS</i>                                 |
| Boeke-EMH-H3-158 K36E                     | H3K36E - JB                                              | <i>MAT<math>\alpha</math> his3<math>\Delta</math>200 leu2<math>\Delta</math>0 lys2<math>\Delta</math>0 trp1<math>\Delta</math>63 ura3<math>\Delta</math>0 met15<math>\Delta</math>0 hht1-hhf1::NatMX4 can1::MFA1pr-HIS3 hht2-hhf2::URA3-hhfs(K36E)-HHFS</i>                                 |
| PSY40                                     | <i>rph1<math>\Delta</math></i> in H3K36 - JB             | <i>MAT<math>\alpha</math> his3<math>\Delta</math>200 leu2<math>\Delta</math>0 lys2<math>\Delta</math>0 trp1<math>\Delta</math>63 ura3<math>\Delta</math>0 met15<math>\Delta</math>0 hht1-hhf1::NatMX4 can1::MFA1pr-HIS3 hht2-hhf2::URA3-HHTS-HHFS rph1<math>\Delta</math>::kanMX4</i>       |
| PSY41                                     | <i>rph1<math>\Delta</math></i> in H3K36R - JB            | <i>MAT<math>\alpha</math> his3<math>\Delta</math>200 leu2<math>\Delta</math>0 lys2<math>\Delta</math>0 trp1<math>\Delta</math>63 ura3<math>\Delta</math>0 met15<math>\Delta</math>0 hht1-hhf1::NatMX4 can1::MFA1pr-HIS3 hht2-hhf2::URA3-hhfs(K36R)-HHFS rph1<math>\Delta</math>::kanMX4</i> |
| PSY42                                     | <i>rph1<math>\Delta</math></i> in H3K36A - JB            | <i>MAT<math>\alpha</math> his3<math>\Delta</math>200 leu2<math>\Delta</math>0 lys2<math>\Delta</math>0 trp1<math>\Delta</math>63 ura3<math>\Delta</math>0 met15<math>\Delta</math>0 hht1-hhf1::NatMX4 can1::MFA1pr-HIS3 hht2-hhf2::URA3-hhfs(K36A)-HHFS rph1<math>\Delta</math>::kanMX4</i> |
| PSY43                                     | <i>rph1<math>\Delta</math></i> in H3K36Q - JB            | <i>MAT<math>\alpha</math> his3<math>\Delta</math>200 leu2<math>\Delta</math>0 lys2<math>\Delta</math>0 trp1<math>\Delta</math>63 ura3<math>\Delta</math>0 met15<math>\Delta</math>0 hht1-hhf1::NatMX4 can1::MFA1pr-HIS3 hht2-hhf2::URA3-hhfs(K36Q)-HHFS rph1<math>\Delta</math>::kanMX4</i> |
| PSY44                                     | <i>rph1<math>\Delta</math></i> in H3K36E - JB            | <i>MAT<math>\alpha</math> his3<math>\Delta</math>200 leu2<math>\Delta</math>0 lys2<math>\Delta</math>0 trp1<math>\Delta</math>63 ura3<math>\Delta</math>0 met15<math>\Delta</math>0 hht1-hhf1::NatMX4 can1::MFA1pr-HIS3 hht2-hhf2::URA3-hhfs(K36E)-HHFS rph1<math>\Delta</math>::kanMX4</i> |
| YBL619                                    | Eaf3-chromodomain $\Delta$ /Rco1-TAP                     | <i>MAT<math>\alpha</math> his3<math>\Delta</math>1 leu2<math>\Delta</math>0 lys2<math>\Delta</math>0 ura3<math>\Delta</math>0 eaf3-chd77-113<math>\Delta</math> FLAG:Leu2 Rco1-TAP</i>                                                                                                      |
| YBL634                                    | Rco1-PHDA-TAP:HIS                                        | <i>MAT<math>\alpha</math> his3<math>\Delta</math>1 leu2<math>\Delta</math>0 met15<math>\Delta</math>0 ura3<math>\Delta</math>0 Rco1-PHDA-TAP:HIS</i>                                                                                                                                        |
| YBL694                                    | eaf3-chromodomain $\Delta$ /Rco1-PHDA-TAP:HIS (CR)       | <i>MAT<math>\alpha</math> Rco1-PHDA-TAP:HIS/eaf3<math>\Delta</math>chromodomain</i>                                                                                                                                                                                                         |

\* **JB** (Jef Boeke)



Table S2 – Statistical data for lifespan experiments validating the histone mutant screen (colored rows indicate significant p-values)

| Histone | Mutation           | Scr2 Log2 | Scr2 LS     | LS    | LS N | LS WT | LS WT N | p-value  | Change |
|---------|--------------------|-----------|-------------|-------|------|-------|---------|----------|--------|
| H3      | T80D               | -2.250    | Short-lived | 16.39 | 80   | 23.84 | 80      | 7.94E-04 | -31.3% |
| H3      | K79E               | -2.025    | Short-lived | 13.77 | 47   | 18.64 | 45      | 9.09E-03 | -26.2% |
| H3      | DEL9-16            | -1.750    | Short-lived | 11.00 | 20   | 10.50 | 20      | 6.89E-01 | 4.8%   |
| H4      | R36K               | -1.700    | Short-lived | 17.09 | 140  | 24.58 | 140     | 1.80E-09 | -30.5% |
| H3      | K9Q,K14Q,K18Q,K23Q | -1.700    | Short-lived | 21.51 | 140  | 21.57 | 140     | 8.37E-02 | -0.3%  |
| H3      | DEL9-32            | -1.625    | Short-lived | 11.21 | 19   | 12.10 | 20      | 7.84E-01 | -7.4%  |
| H3      | DEL17-28           | -1.625    | Short-lived | 11.55 | 20   | 12.10 | 20      | 8.98E-01 | -4.5%  |
| H4      | N25D               | -1.575    | Short-lived | 18.74 | 123  | 25.49 | 123     | 2.14E-05 | -26.5% |
| H3      | S86D               | -1.525    | Short-lived | 19.95 | 124  | 23.29 | 125     | 1.15E-01 | -14.3% |
| H3      | K56Q               | -1.500    | Short-lived | 6.68  | 59   | 27.18 | 60      | 1.14E-15 | -75.4% |
| H4      | R19E               | -1.475    | Short-lived | 21.69 | 80   | 29.28 | 80      | 1.22E-05 | -25.9% |
| H3      | K14R               | -1.475    | Short-lived | 23.57 | 120  | 22.68 | 120     | 3.89E-01 | 3.9%   |
| H3      | DEL5-24            | -1.475    | Short-lived | 10.70 | 20   | 12.10 | 20      | 4.68E-01 | -11.6% |
| H3      | DEL13-20           | -1.475    | Short-lived | 19.80 | 20   | 14.40 | 20      | 5.21E-03 | 37.5%  |
| H3      | L82A               | -1.450    | Short-lived | 15.17 | 60   | 27.18 | 60      | 3.52E-08 | -44.2% |
| H3      | DEL21-36           | -1.325    | Short-lived | 14.05 | 20   | 14.40 | 20      | 5.67E-01 | -2.4%  |
| H4      | R3A                | -1.250    | Short-lived | 22.45 | 145  | 24.43 | 143     | 1.01E-01 | -8.1%  |
| H4      | K16R               | -1.225    | Short-lived | 21.94 | 99   | 27.00 | 100     | 7.59E-04 | -18.7% |
| H4      | L22A               | -1.175    | Short-lived | 21.03 | 80   | 29.28 | 80      | 1.70E-03 | -28.2% |
| H3      | K9A,K14A,K18A,K23A | -1.175    | Short-lived | 15.49 | 79   | 16.33 | 80      | 7.91E-01 | -5.1%  |
| H3      | E73Q               | -1.175    | Short-lived | 19.97 | 60   | 27.18 | 60      | 8.09E-04 | -26.6% |
| H3      | K14Q               | -1.150    | Short-lived | 22.87 | 60   | 18.18 | 60      | 2.33E-02 | 25.8%  |
| H3      | DEL13-16           | -1.125    | Short-lived | 18.85 | 20   | 14.40 | 20      | 2.32E-02 | 30.9%  |
| H3      | DEL17-20           | -1.100    | Short-lived | 27.55 | 20   | 14.40 | 20      | 1.08E-06 | 91.3%  |
| H4      | G101A              | -1.075    | Short-lived | 16.95 | 20   | 18.15 | 20      | 8.60E-01 | -6.6%  |
| H3      | K36E               | -1.075    | Short-lived | 17.49 | 140  | 28.48 | 140     | 3.59E-18 | -38.6% |
| H3      | DEL4-30            | -1.050    | Short-lived | 6.33  | 15   | 12.10 | 20      | 2.17E-03 | -47.7% |
| H3      | DEL4-20            | -1.025    | Short-lived | 14.70 | 20   | 14.40 | 20      | 7.65E-01 | 2.1%   |
| H3      | DEL17-24           | -1.000    | Normal      | 23.95 | 20   | 14.40 | 20      | 4.45E-05 | 66.3%  |
| H3      | DEL17-32           | -1.000    | Normal      | 10.25 | 20   | 17.90 | 20      | 7.98E-05 | -42.7% |
| H3      | DEL9-28            | -0.950    | Normal      | 6.94  | 18   | 12.10 | 20      | 3.35E-03 | -42.6% |
| H3      | DEL13-28           | -0.875    | Normal      | 7.88  | 16   | 12.10 | 20      | 2.72E-02 | -34.9% |
| H3      | DEL13-32           | -0.850    | Normal      | 8.35  | 20   | 17.90 | 20      | 1.06E-04 | -53.4% |
| H3      | K36R               | -0.850    | Normal      | 20.04 | 140  | 28.48 | 140     | 4.02E-12 | -29.6% |
| H3      | DEL1-24            | -0.800    | Normal      | 10.30 | 20   | 17.90 | 20      | 5.51E-04 | -42.5% |

|    |                    |        |             |       |     |       |     |          |        |
|----|--------------------|--------|-------------|-------|-----|-------|-----|----------|--------|
| H3 | DEL1-28            | -0.775 | Short-lived | 7.15  | 34  | 14.47 | 60  | 1.43E-10 | -50.6% |
| H4 | DEL1-12            | -0.700 | Normal      | 12.05 | 20  | 9.95  | 20  | 1.86E-01 | 21.1%  |
| H3 | DEL13-24           | -0.700 | Normal      | 18.05 | 20  | 14.40 | 20  | 5.53E-02 | 25.3%  |
| H3 | K36Q               | -0.550 | Normal      | 19.16 | 140 | 28.48 | 140 | 7.11E-14 | -32.7% |
| H3 | DEL9-24            | -0.500 | Normal      | 13.70 | 40  | 14.47 | 60  | 2.72E-01 | -5.3%  |
| H3 | K115A              | -0.475 | Normal      | 19.20 | 20  | 14.40 | 20  | 1.46E-02 | 33.3%  |
| H3 | K36A               | -0.350 | Normal      | 17.33 | 139 | 28.48 | 140 | 1.92E-18 | -39.1% |
| H3 | K122R              | -0.325 | Normal      | 14.20 | 20  | 14.40 | 20  | 7.14E-01 | -1.4%  |
| H4 | DEL5-12            | -0.300 | Normal      | 13.89 | 19  | 15.85 | 20  | 6.77E-01 | -12.3% |
| H3 | DEL5-32            | -0.200 | Normal      | 5.88  | 17  | 10.50 | 20  | 5.00E-04 | -44.0% |
| H3 | K9R,K14R,K18R,K23R | -0.150 | Normal      | 17.08 | 40  | 14.83 | 40  | 4.15E-02 | 15.2%  |
| H3 | T58D               | -0.150 | Normal      | 17.22 | 60  | 16.25 | 60  | 1.90E-01 | 6.0%   |
| H3 | K122A              | -0.125 | Normal      | 19.10 | 20  | 14.40 | 20  | 4.03E-03 | 32.6%  |
| H3 | R72K               | -0.125 | Normal      | 28.73 | 60  | 27.18 | 60  | 5.13E-01 | 5.7%   |
| H4 | K79Q               | -0.025 | Normal      | 14.35 | 20  | 17.90 | 20  | 4.20E-02 | -19.8% |
| H4 | DEL1-8             | -0.025 | Normal      | 17.55 | 20  | 15.85 | 20  | 1.95E-01 | 10.7%  |
| H3 | L60A               | -0.025 | Normal      | 13.80 | 40  | 14.47 | 60  | 2.36E-01 | -4.6%  |
| H4 | I46A               | 0.050  | Normal      | 8.94  | 17  | 9.95  | 20  | 4.13E-01 | -10.1% |
| H3 | L61A               | 0.050  | Normal      | 15.00 | 60  | 15.72 | 60  | 8.67E-01 | -4.6%  |
| H3 | T32D               | 0.100  | Normal      | 15.30 | 20  | 14.40 | 20  | 3.63E-01 | 6.3%   |
| H4 | R39K               | 0.125  | Normal      | 10.95 | 39  | 15.68 | 60  | 1.09E-05 | -30.2% |
| H3 | K4A                | 0.125  | Normal      | 14.85 | 120 | 20.81 | 80  | 1.12E-06 | -28.6% |
| H3 | A1S                | 0.150  | Normal      | 13.05 | 20  | 14.40 | 20  | 1.59E-01 | -9.4%  |
| H3 | S135D              | 0.175  | Normal      | 17.65 | 20  | 14.40 | 20  | 1.16E-02 | 22.6%  |
| H4 | R23A               | 0.200  | Normal      | 13.41 | 39  | 15.68 | 60  | 7.77E-02 | -14.5% |
| H3 | S31D               | 0.250  | Normal      | 16.90 | 20  | 14.40 | 20  | 6.69E-02 | 17.4%  |
| H3 | R72A               | 0.325  | Long-lived  | 15.53 | 40  | 14.47 | 60  | 2.92E-01 | 7.3%   |
| H4 | K77A               | 0.325  | Long-lived  | 22.65 | 20  | 17.90 | 20  | 8.28E-02 | 26.5%  |
| H3 | L70A               | 0.350  | Long-lived  | 21.95 | 20  | 17.90 | 20  | 4.47E-02 | 22.6%  |
| H3 | E133Q              | 0.350  | Long-lived  | 19.00 | 20  | 14.40 | 20  | 1.87E-02 | 31.9%  |
| H4 | Q27E               | 0.350  | Long-lived  | 12.90 | 20  | 9.95  | 20  | 4.36E-02 | 29.6%  |
| H3 | R128A              | 0.375  | Long-lived  | 20.55 | 20  | 14.40 | 20  | 5.35E-04 | 42.7%  |
| H3 | T3A                | 0.400  | Long-lived  | 16.65 | 20  | 14.40 | 20  | 6.10E-02 | 15.6%  |
| H4 | G99A               | 0.400  | Long-lived  | 14.07 | 58  | 18.32 | 60  | 2.79E-04 | -23.2% |
| H3 | G132A              | 0.675  | Long-lived  | 14.95 | 20  | 14.40 | 20  | 6.34E-01 | 3.8%   |
| H3 | K64A               | 0.750  | Long-lived  | 18.50 | 20  | 14.40 | 20  | 2.07E-01 | 28.5%  |
| H3 | A111S              | 0.750  | Long-lived  | 18.60 | 20  | 14.40 | 20  | 1.19E-01 | 29.2%  |
| H4 | K31A               | 0.825  | Long-lived  | 13.80 | 60  | 18.32 | 60  | 3.02E-02 | -24.7% |
| H4 | T30D               | 0.875  | Long-lived  | 18.52 | 44  | 18.44 | 43  | 8.25E-01 | 0.4%   |
| H3 | K121Q              | 0.925  | Long-lived  | 15.98 | 45  | 18.64 | 45  | 1.52E-01 | -14.3% |
| H3 | A110S              | 0.925  | Long-lived  | 23.20 | 20  | 14.40 | 20  | 2.60E-05 | 61.1%  |

|    |        |       |            |       |     |       |     |          |        |
|----|--------|-------|------------|-------|-----|-------|-----|----------|--------|
| H3 | T3D    | 0.975 | Long-lived | 16.60 | 123 | 22.06 | 125 | 4.69E-04 | -24.8% |
| H3 | Q68A   | 1.000 | Long-lived | 10.37 | 60  | 27.18 | 60  | 1.12E-11 | -61.9% |
| H4 | DEL1-4 | 1.025 | Long-lived | 19.90 | 80  | 29.28 | 80  | 2.50E-07 | -32.0% |
| H4 | V81A   | 1.075 | Long-lived | 15.81 | 67  | 29.28 | 80  | 8.60E-14 | -46.0% |
| H3 | R63A   | 1.125 | Long-lived | 19.48 | 60  | 27.18 | 60  | 9.75E-04 | -28.3% |
| H3 | K42A   | 1.150 | Long-lived | 8.43  | 60  | 27.18 | 60  | 8.75E-14 | -69.0% |
| H4 | R55A   | 1.150 | Long-lived | 22.21 | 80  | 29.28 | 80  | 1.30E-04 | -24.1% |
| H4 | L62A   | 1.150 | Long-lived | 23.69 | 80  | 29.28 | 80  | 1.18E-03 | -19.1% |
| H3 | G44A   | 1.200 | Long-lived | 10.18 | 60  | 27.18 | 60  | 1.56E-12 | -62.5% |
| H3 | R69K   | 1.300 | Long-lived | 17.43 | 60  | 27.18 | 60  | 1.00E-05 | -35.9% |
| H3 | K18Q   | 1.350 | Long-lived | 19.57 | 60  | 27.18 | 60  | 6.79E-04 | -28.0% |
| H4 | E52R   | 1.375 | Long-lived | 6.47  | 79  | 29.28 | 80  | 1.17E-25 | -77.9% |
| H4 | D85A   | 1.400 | Long-lived | 14.14 | 111 | 25.49 | 123 | 1.63E-12 | -44.5% |
| H4 | L97A   | 1.425 | Long-lived | 11.99 | 80  | 29.28 | 80  | 2.21E-19 | -59.1% |
| H3 | K42Q   | 1.625 | Long-lived | 12.00 | 60  | 27.18 | 60  | 3.37E-10 | -55.9% |
| H4 | K44A   | 2.250 | Long-lived | 18.85 | 105 | 27.98 | 104 | 1.91E-07 | -32.6% |

Table S3 – Statistical data for replicative lifespan experiments in this study, excluding those validating histone mutant lifespan.

| Figure        | Test                       | Mating type | Test LS | Test cell # | Reference (Ref)  | Ref LS | Ref cell # | p-value  |
|---------------|----------------------------|-------------|---------|-------------|------------------|--------|------------|----------|
| <b>2F</b>     | <i>rph1Δ</i>               | Combined    | 35.71   | 85          | WT               | 28.10  | 105        | 4.27E-06 |
|               |                            | MATa        | 34.48   | 60          | WT               | 30.22  | 60         | 0.0276   |
|               |                            | MATα        | 38.64   | 25          | WT               | 25.27  | 45         | 5.59E-05 |
| <b>S4</b>     | <i>jhd1Δ</i>               | MATα        | 29.12   | 25          | WT               | 32.02  | 45         | 0.458    |
| <b>2G</b>     | <i>set2Δ</i>               | Combined    | 24.05   | 599         | WT               | 28.15  | 239        | 1.10E-07 |
|               |                            | MATa        | 23.13   | 360         | WT               | 28.81  | 159        | 1.93E-08 |
|               |                            | MATα        | 25.45   | 239         | WT               | 26.86  | 80         | 0.175    |
| <b>2E, 2H</b> | H3K36E                     | MATa        | 17.49   | 140         | H3WT             | 28.48  | 140        | 3.59E-18 |
|               | H3K36E <i>rph1Δ</i>        | MATa        | 19.31   | 140         | H3K36E           | 17.49  | 140        | 0.151    |
|               | H3WT <i>rph1Δ</i>          | MATa        | 31.3    | 120         | H3WT             | 26.93  | 120        | 0.005    |
| <b>2E, 2I</b> | H3K36R                     | MATa        | 22.42   | 100         | H3WT             | 28.48  | 140        | 5.25E-06 |
|               | H3K36R <i>rph1Δ</i>        | MATa        | 24.24   | 100         | H3K36R           | 22.42  | 100        | 0.137    |
|               | H3WT <i>rph1Δ</i>          | MATa        | 31.3    | 120         | H3WT             | 26.93  | 120        | 0.005    |
| <b>2E, 2J</b> | H3K36A                     | MATa        | 17.33   | 139         | H3WT             | 28.48  | 140        | 1.92E-18 |
|               | H3K36A <i>rph1Δ</i>        | MATa        | 20.96   | 139         | H3K36A           | 17.33  | 139        | 0.0444   |
|               | H3WT <i>rph1Δ</i>          | MATa        | 31.3    | 120         | H3WT             | 26.93  | 120        | 0.005    |
| <b>2E, 2K</b> | H3K36Q                     | MATa        | 19.16   | 140         | H3WT             | 28.48  | 140        | 7.11E-14 |
|               | H3K36Q <i>rph1Δ</i>        | MATa        | 20.37   | 138         | H3K36Q           | 22.65  | 75         | 0.110    |
|               | H3WT <i>rph1Δ</i>          | MATa        | 31.3    | 120         | H3WT             | 26.93  | 120        | 0.005    |
| <b>5A</b>     | <i>eaf3-CHDΔ</i>           | MATα        | 18.58   | 80          | WT               | 26.86  | 80         | 1.52E-08 |
|               | <i>eaf3-CHDΔ rcol-PHDΔ</i> | MATα        | 20.11   | 80          | <i>eaf3-CHDΔ</i> | 18.58  | 80         | 0.162    |
| <b>5B</b>     | <i>rcol-PHDΔ</i>           | MATa        | 24.26   | 80          | WT               | 27.54  | 79         | 0.0366   |

Table S4 – RNA-seq and ChIP-seq datasets

| <b>Name of dataset</b> | <b>Library Prep</b>    | <b>Technical/Biological repeat</b> | <b>Samples</b>                                         |
|------------------------|------------------------|------------------------------------|--------------------------------------------------------|
| E1                     | Short fragment RNA-seq | biological                         | WT                                                     |
| E2                     | Short fragment RNA-seq | biological                         | WT                                                     |
| E3                     | Short fragment RNA-seq | biological                         | WT and <i>rph1</i> Δ                                   |
| E4                     | Short fragment RNA-seq | technical of E3                    | WT and <i>rph1</i> Δ                                   |
| E5                     | Short fragment RNA-seq | biological                         | WT and <i>rph1</i> Δ                                   |
| E6                     | Short fragment RNA-seq | biological                         | Day 1 non-FuDR, Day 1 FuDR, Day 8 FuDR and Day 12 FuDR |
| E7                     | Long fragment RNA-seq  | biological                         | WT and <i>rph1</i> Δ                                   |
| E8                     | Long fragment RNA-seq  | biological                         | WT and <i>rph1</i> Δ                                   |
| E9                     | Long fragment RNA-seq  | biological                         | WT and <i>rph1</i> Δ                                   |
| F1                     | ChIP-seq               | biological                         | WT and <i>rph1</i> Δ                                   |
| F2                     | ChIP-seq               | biological                         | WT and <i>rph1</i> Δ                                   |

Table S5 – alignment and reproducibility parameters for high throughput sequencing datasets

A. Table of alignment parameters

| Name of dataset | Genetic background/treatment | Sort/timepoint | Total tags | Aligned tags | Percent aligned | Coverage |
|-----------------|------------------------------|----------------|------------|--------------|-----------------|----------|
| E1              | WT                           | Young          | 83775228   | 29749097     | 35.5            | 122.3    |
|                 | WT                           | Old            | 87814164   | 25038374     | 28.5            | 102.9    |
| E2              | WT                           | Young          | 110931589  | 37070368     | 33.4            | 152.4    |
|                 | WT                           | Old            | 114830029  | 36067983     | 31.4            | 148.3    |
| E3              | WT                           | Young          | 37162759   | 18004733     | 48.5            | 51.8     |
|                 | WT                           | Old            | 27606218   | 16241864     | 58.8            | 46.7     |
|                 | WT                           | Older          | 36790452   | 23061602     | 62.7            | 66.4     |
|                 | <i>rph1Δ</i>                 | Young          | 37240522   | 20751442     | 55.7            | 59.7     |
|                 | <i>rph1Δ</i>                 | Old            | 38579992   | 21952411     | 56.9            | 63.2     |
|                 | <i>rph1Δ</i>                 | Older          | 43842136   | 27613288     | 63              | 79.5     |
| E4              | WT                           | Young          | 24605070   | 11921046     | 48.5            | 34.3     |
|                 | WT                           | Old            | 26579917   | 17754303     | 66.8            | 51.1     |
|                 | WT                           | Older          | 26728331   | 12762137     | 47.8            | 36.7     |
|                 | <i>rph1Δ</i>                 | Young          | 26665617   | 14256359     | 53.5            | 41       |
|                 | <i>rph1Δ</i>                 | Old            | 22632434   | 13185863     | 58.3            | 37.9     |
|                 | <i>rph1Δ</i>                 | Older          | 31026649   | 21162082     | 68.2            | 60.9     |
| E5              | WT                           | Young          | 88043317   | 57786335     | 65.6            | 237.6    |
|                 | WT                           | Old            | 74513438   | 42310819     | 56.8            | 173.9    |
|                 | WT                           | Older          | 89871748   | 51406697     | 57.2            | 211.3    |
|                 | <i>rph1Δ</i>                 | Young          | 67124411   | 46509057     | 69.3            | 191.2    |
|                 | <i>rph1Δ</i>                 | Old            | 67217390   | 44879970     | 66.8            | 184.5    |
|                 | <i>rph1Δ</i>                 | Older          | 104503620  | 65379134     | 62.6            | 268.8    |
| E6              | No FuDR                      | Day 1          | 128081626  | 94282933     | 73.6            | 70.5     |
|                 | FuDR                         | Day 1          | 104362651  | 77954619     | 74.7            | 58.3     |

|    |                         |        |           |          |      |       |
|----|-------------------------|--------|-----------|----------|------|-------|
|    | FuDR                    | Day 8  | 113350994 | 84867363 | 74.9 | 63.5  |
|    | FuDR                    | Day 12 | 103086819 | 79592292 | 77.2 | 59.5  |
| E7 | WT                      | Young  | 17981520  | 26810371 | 74.6 | 220.4 |
|    | WT                      | Old    | 16186073  | 22852969 | 70.6 | 187.9 |
|    | <i>rph1Δ</i>            | Young  | 21186508  | 31410180 | 74.1 | 258.2 |
|    | <i>rph1Δ</i>            | Old    | 15189759  | 20880878 | 68.7 | 171.7 |
| E8 | WT                      | Young  | 25280561  | 31426014 | 62.2 | 258.4 |
|    | WT                      | Old    | 20527733  | 20378949 | 49.6 | 167.6 |
|    | <i>rph1Δ</i>            | Young  | 23787692  | 27402759 | 57.6 | 225.3 |
|    | <i>rph1Δ</i>            | Old    | 19824118  | 18789072 | 47.4 | 154.5 |
| E9 | WT                      | Young  | 27997043  | 31879961 | 56.9 | 262.1 |
|    | WT                      | Old    | 25837586  | 28756961 | 55.7 | 236.4 |
|    | <i>rph1Δ</i>            | Young  | 24535409  | 28761163 | 58.6 | 236.5 |
|    | <i>rph1Δ</i>            | Old    | 26618078  | 25569726 | 48   | 210.2 |
| F1 | WT – input              | Young  | 18873898  | 15379199 | 81.5 | 63.2  |
|    | WT – input              | Old    | 25465014  | 11246820 | 44.2 | 46.2  |
|    | WT – H3K36me3           | Young  | 16314160  | 14636461 | 89.7 | 60.2  |
|    | WT – H3K36me3           | Old    | 14052366  | 6059872  | 43.1 | 24.9  |
|    | WT – H3                 | Young  | 15688854  | 13097761 | 83.5 | 53.8  |
|    | WT – H3                 | Old    | 22786162  | 9058257  | 39.8 | 37.2  |
|    | <i>rph1Δ</i> – input    | Young  | 11830255  | 9521043  | 80.5 | 39.1  |
|    | <i>rph1Δ</i> – input    | Old    | 6632095   | 2791428  | 42.1 | 11.5  |
|    | <i>rph1Δ</i> – H3K36me3 | Young  | 9732730   | 8771822  | 90.1 | 36.1  |
|    | <i>rph1Δ</i> – H3K36me3 | Old    | 8381044   | 3712409  | 44.3 | 15.3  |
|    | <i>rph1Δ</i> – H3       | Young  | 7518831   | 6249703  | 83.1 | 25.7  |
|    | <i>rph1Δ</i> – H3       | Old    | 8502975   | 3373504  | 39.7 | 13.9  |
| F2 | WT – input              | Young  | 107866519 | 80240258 | 74.4 | 494.8 |

|                         |       |          |          |      |       |
|-------------------------|-------|----------|----------|------|-------|
| WT – input              | Old   | 53169531 | 22547738 | 42.4 | 139   |
| WT – H3K36me3           | Young | 55239956 | 45028512 | 81.5 | 277.7 |
| WT – H3K36me3           | Old   | 52886977 | 21096496 | 39.9 | 130.1 |
| WT – H3                 | Young | 46785809 | 35595219 | 76.1 | 219.5 |
| WT – H3                 | Old   | 51338271 | 21097609 | 41.1 | 130.1 |
| <i>rph1Δ</i> – input    | Young | 61591394 | 47253860 | 76.7 | 252.2 |
| <i>rph1Δ</i> – input    | Old   | 48396395 | 21158802 | 43.7 | 166.6 |
| <i>rph1Δ</i> – H3K36me3 | Young | 73002519 | 58406281 | 80   | 360.2 |
| <i>rph1Δ</i> – H3K36me3 | Old   | 55972074 | 25563972 | 45.7 | 157.6 |
| <i>rph1Δ</i> – H3       | Young | 58278447 | 40902143 | 70.2 | 291.4 |
| <i>rph1Δ</i> – H3       | Old   | 58583365 | 27013429 | 46.1 | 130.5 |

B. Table of reproducibility parameters

Pearson correlation table for RNA-seq tags over 3' half of cryptic genes in WT Young

|           | <b>E1</b> | <b>E2</b> | <b>E3</b> | <b>E4</b> | <b>E5</b> |
|-----------|-----------|-----------|-----------|-----------|-----------|
| <b>E1</b> | 1         | 0.98      | 0.81      | 0.78      | 0.81      |
| <b>E2</b> | 0.98      | 1         | 0.89      | 0.87      | 0.89      |
| <b>E3</b> | 0.81      | 0.89      | 1         | 1         | 0.97      |
| <b>E4</b> | 0.78      | 0.87      | 1         | 1         | 0.98      |
| <b>E5</b> | 0.81      | 0.89      | 0.97      | 0.98      | 1         |

Pearson correlation table for RNA-seq tags over 3' half of cryptic genes in WT Old

|           | <b>E1</b> | <b>E2</b> | <b>E3</b> | <b>E4</b> | <b>E5</b> |
|-----------|-----------|-----------|-----------|-----------|-----------|
| <b>E1</b> | 1         | 0.99      | 0.89      | 0.83      | 0.81      |
| <b>E2</b> | 0.99      | 1         | 0.9       | 0.86      | 0.77      |
| <b>E3</b> | 0.89      | 0.9       | 1         | 0.96      | 0.8       |
| <b>E4</b> | 0.83      | 0.86      | 0.96      | 1         | 0.72      |
| <b>E5</b> | 0.81      | 0.77      | 0.8       | 0.72      | 1         |



Table S6 – TATA and Initiator motif density

|                 | Number of cryptic genes | Number of annotated cryptic genes | Number of motifs in cryptic genes | Number of cryptic genes with motif | Motif density (number of motifs per Kb of cryptic gene sequence) | Motifs per gene (number of motifs per cryptic gene) | Background = non-cryptic genes |                                         |                            |                             |
|-----------------|-------------------------|-----------------------------------|-----------------------------------|------------------------------------|------------------------------------------------------------------|-----------------------------------------------------|--------------------------------|-----------------------------------------|----------------------------|-----------------------------|
|                 |                         |                                   |                                   |                                    |                                                                  |                                                     | p-values for number of motifs  | p-values for number of genes with motif | p-values for motif density | p-values of motifs per gene |
| Yeast TATA      | 244                     | 244                               | 140                               | 107                                | 0.19                                                             | 0.57                                                | 0.007                          | <0.001                                  | 0.91                       | 0.006                       |
| Yeast Initiator | 244                     | 244                               | 410                               | 171                                | 0.56                                                             | 1.7                                                 | <0.001                         | <0.001                                  | 0.282                      | <0.001                      |
| Worm TATA       | 443                     | 414                               | 145                               | 110                                | 0.35                                                             | 0.07                                                | <0.001                         | <0.001                                  | 0.158                      | <0.001                      |
