# Supplementary figures and images for: H3K36 methylation promotes longevity by enhancing transcriptional fidelity
Source: PubMed Central journal article supplement — Genes Dev. 2015 Jul 1;29(13):1362–76. doi: 10.1101/gad.263707.115 (PMC4511212; doi:10.1101/gad.263707.115), 2015-07-01

**GENESDEV/2015/263707\_Fig. S1\_Sen**

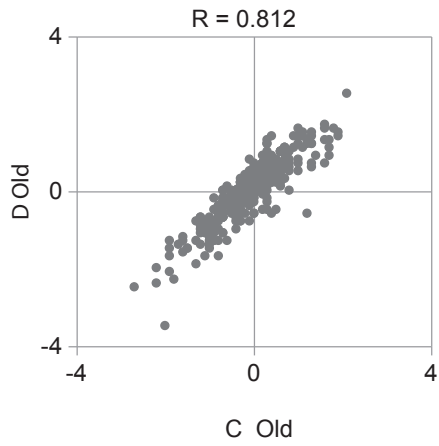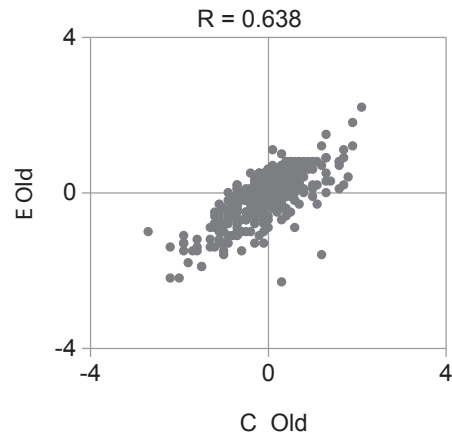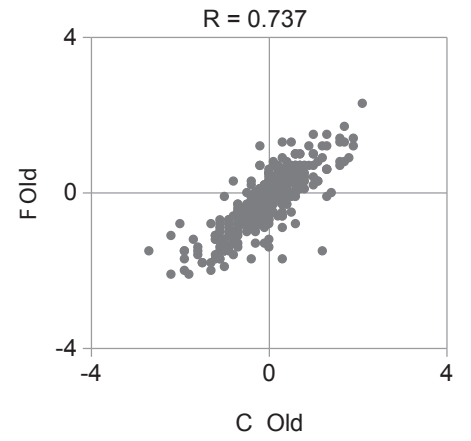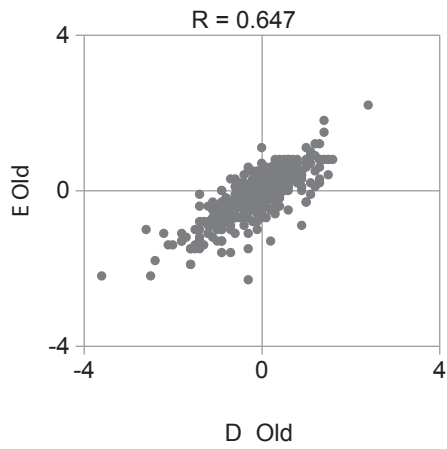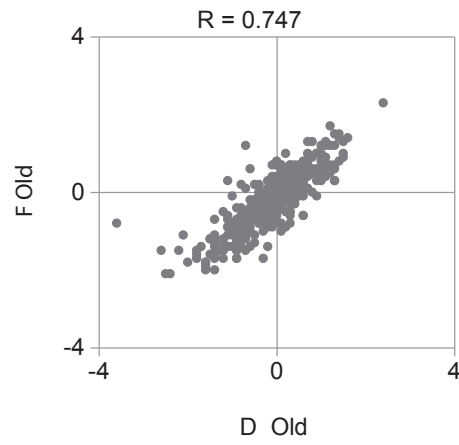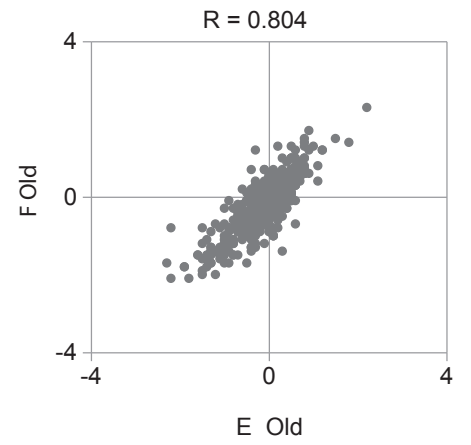

Supplement: supp_29.13.1362_Figure_S1.pdf [file supp_29.13.1362_Figure_S1.pdf]

**GENESDEV/2015/263707\_Fig. S10\_Sen**

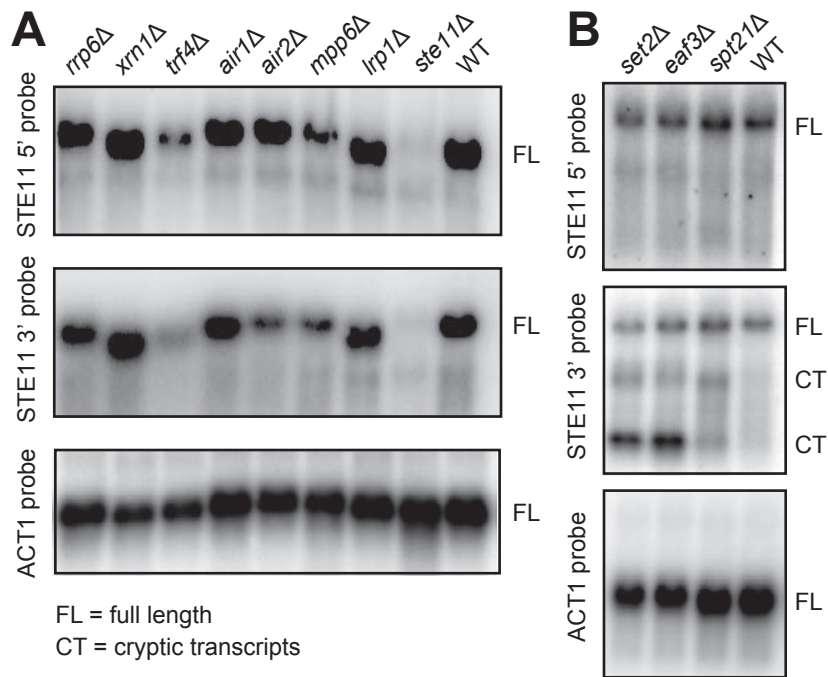

Supplement: supp_29.13.1362_Figure_S10.pdf [file supp_29.13.1362_Figure_S10.pdf]

**GENESDEV/2015/263707\_Fig. S3\_Sen**

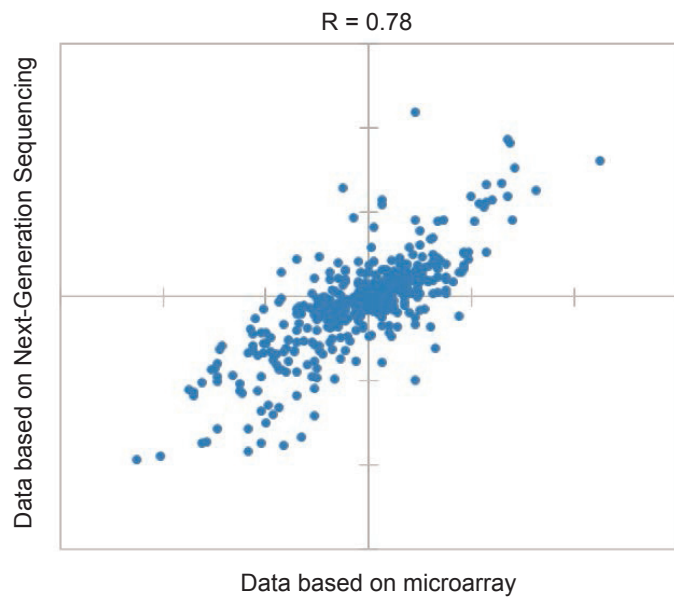

Supplement: supp_29.13.1362_Figure_S3.pdf [file supp_29.13.1362_Figure_S3.pdf]

**GENESDEV/2015/263707\_Fig. S4\_Sen**

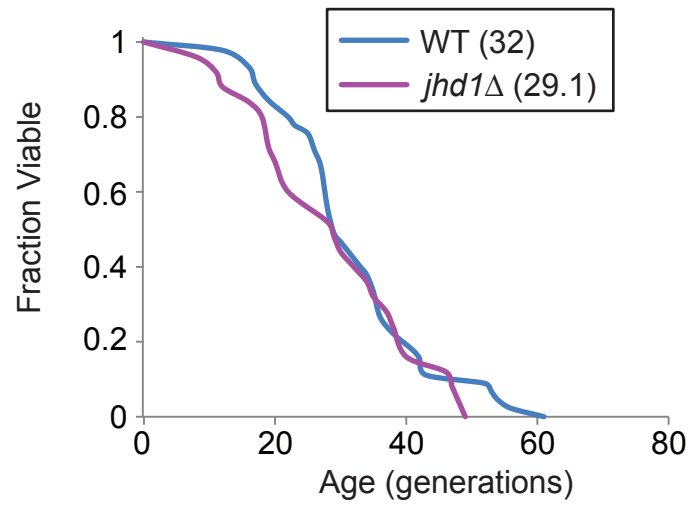

Supplement: supp_29.13.1362_Figure_S4.pdf [file supp_29.13.1362_Figure_S4.pdf]

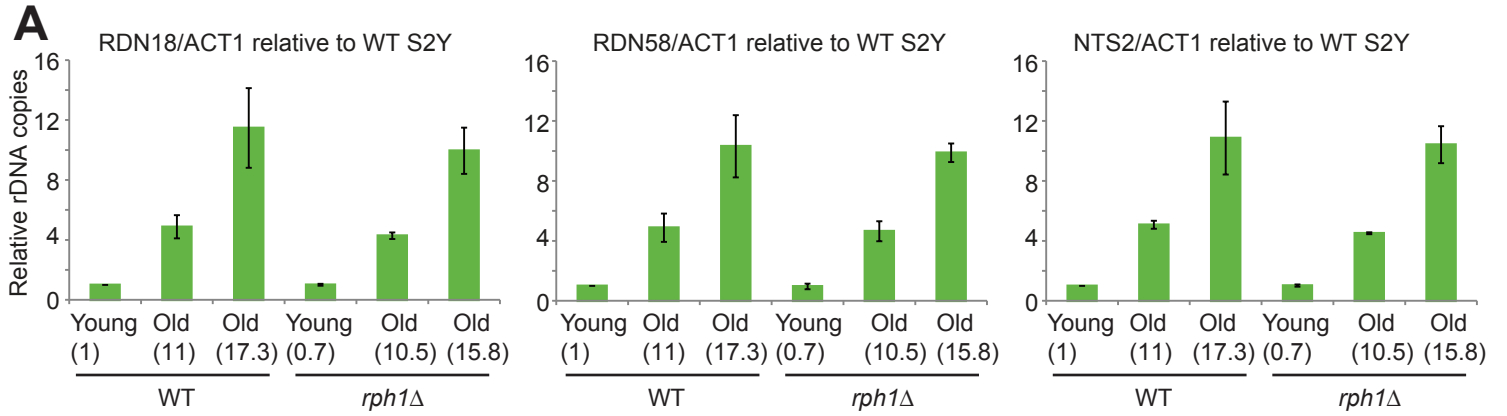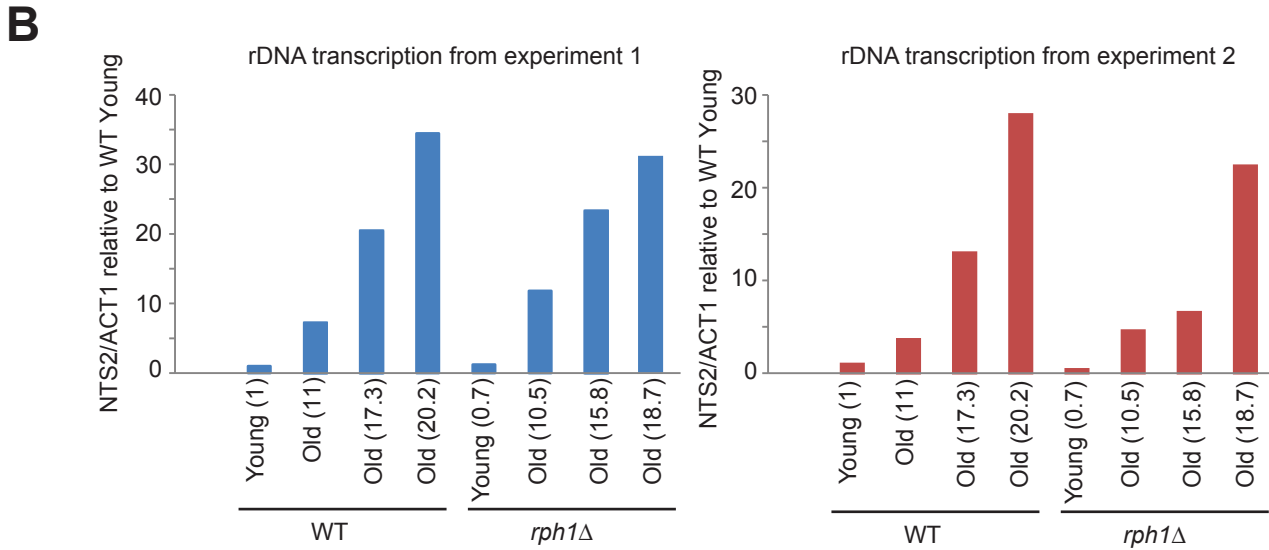

Supplement: supp_29.13.1362_Figure_S5.pdf [file supp_29.13.1362_Figure_S5.pdf]

**GENESDEV/2015/263707\_Fig. S6\_Sen**

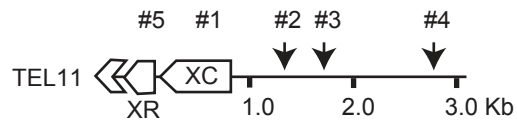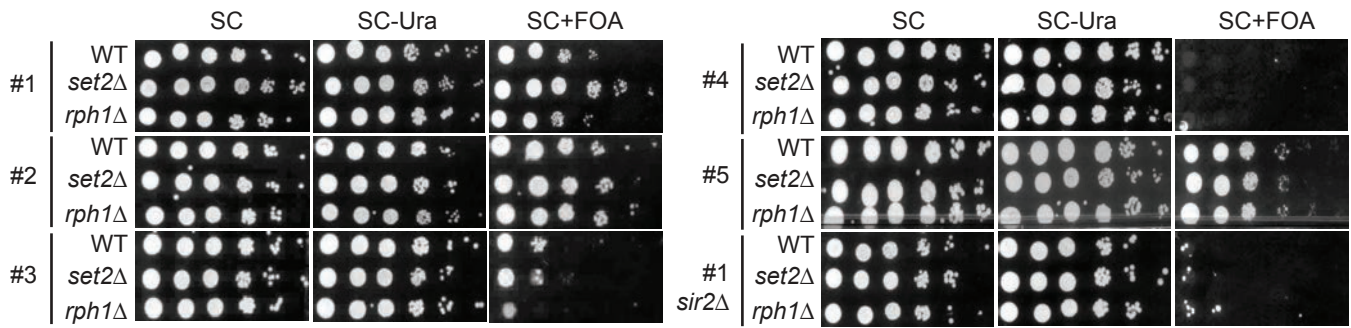

Supplement: supp_29.13.1362_Figure_S6.pdf [file supp_29.13.1362_Figure_S6.pdf]

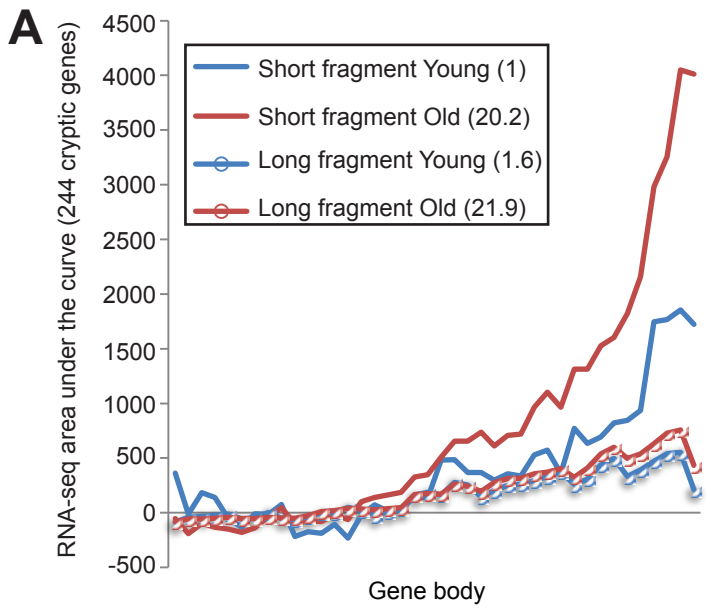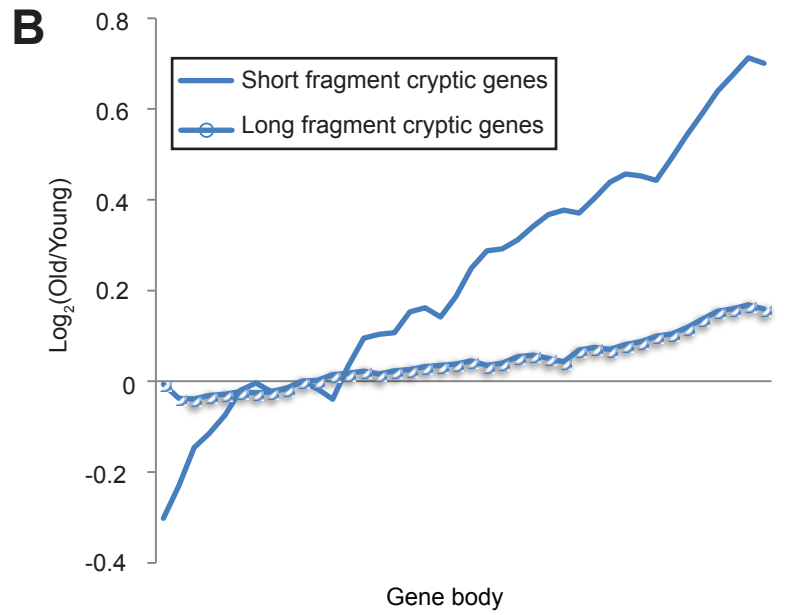

Supplement: supp_29.13.1362_Figure_S7.pdf [file supp_29.13.1362_Figure_S7.pdf]

**GENESDEV/2015/263707\_Fig. S8\_Sen**

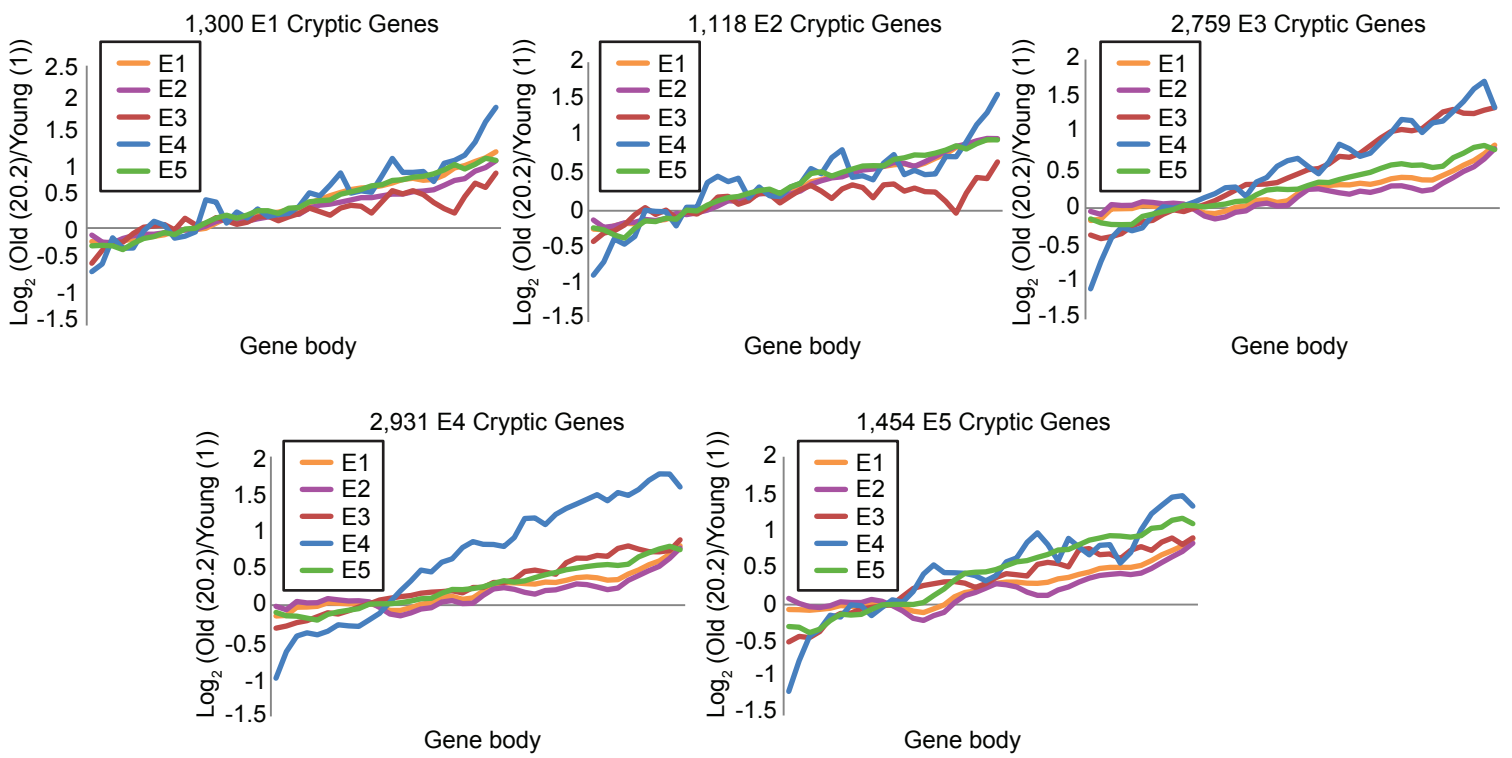

Supplement: supp_29.13.1362_Figure_S8.pdf [file supp_29.13.1362_Figure_S8.pdf]

**GENESDEV/2015/263707\_Fig. S9\_Sen**

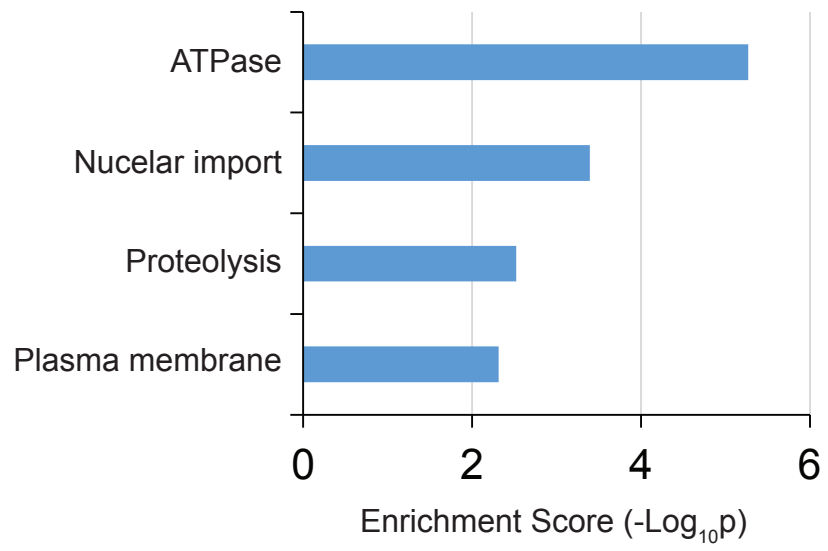

Supplement: supp_29.13.1362_Figure_S9.pdf [file supp_29.13.1362_Figure_S9.pdf]
